# Supplementary material
Source: PubMed Central journal article supplement (PMC2649018)
Supplement: ddp007_1.pdf [file ddp007_1.pdf]

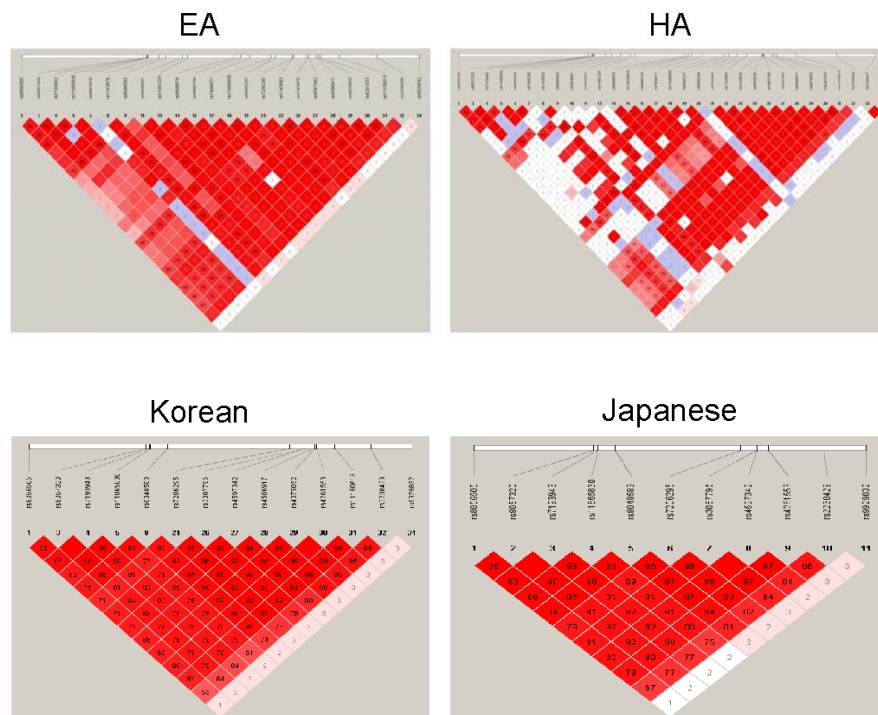

**Supplementary Figure 1.** LD plot from our genotyped data.

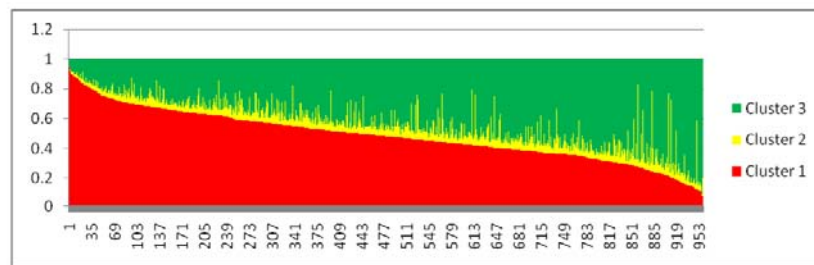

**Supplementary Figure 2.** Individual admixture proportions for Hispanic cases and controls.

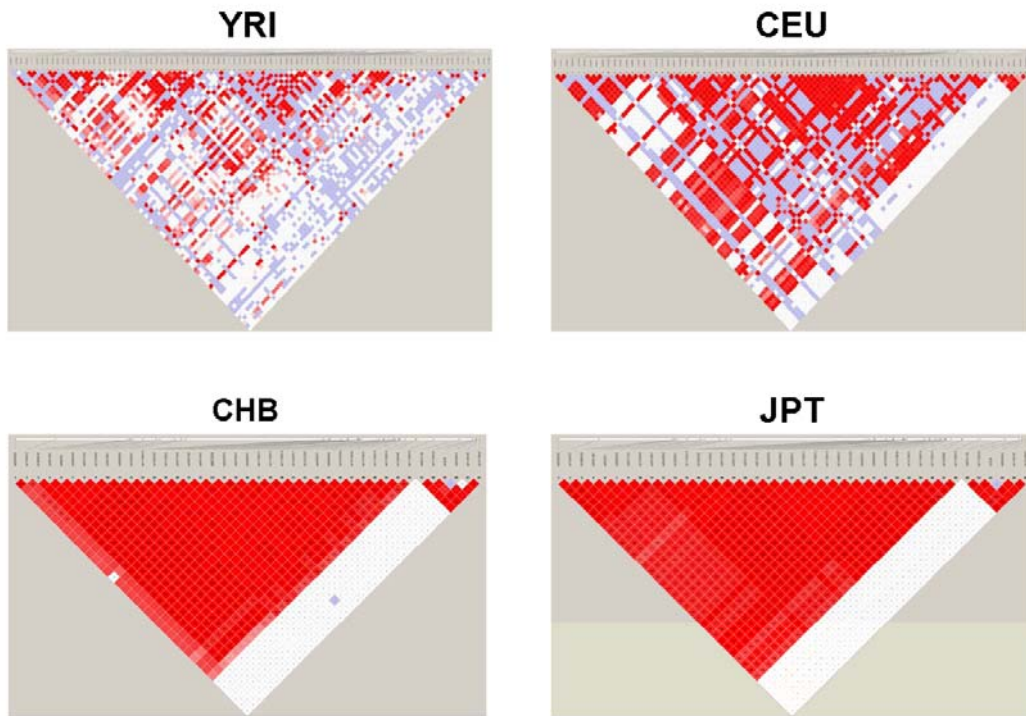

**Supplementary Figure 3.** LD plot from HapMap data.

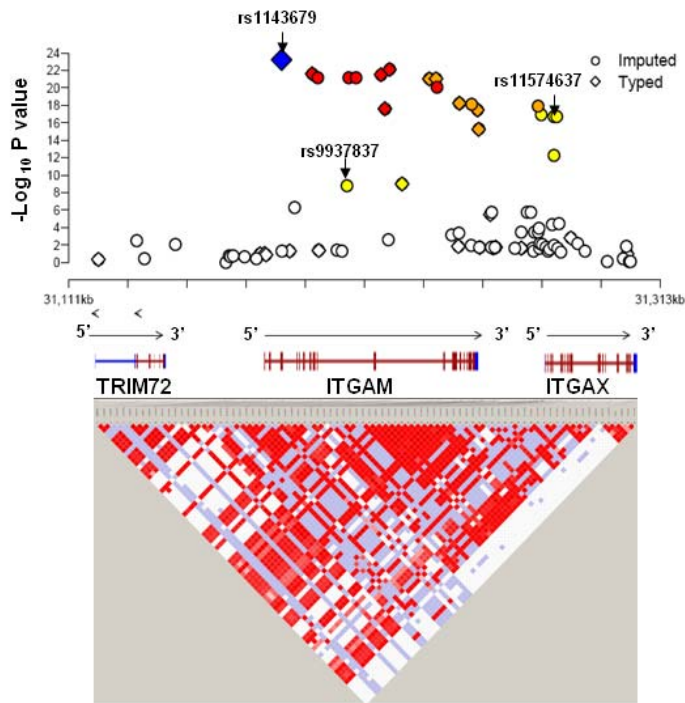

**Supplementary Figure 4.** Bayesian association assessment testing in and around *ITGAM* by IMPUTE/SNPTEST program. All genotyped (diamond) and imputed (circle) SNPs are plotted with their  $-\log_{10} p$ -value along with their physical position (NCBI build 35). The blue diamond is the proposed causal SNP in this study. The colors of white, yellow, orange and red represent the  $r^2$  correlations with rs1143679 (red:  $r^2 \geq 0.8$ ; orange:  $0.5 \leq r^2 < 0.8$ ; yellow:  $0.2 \leq r^2 < 0.5$ ; white:  $r^2 < 0.2$ ). Blocks connecting pairs of SNPs are shaded according to the strength of the linkage disequilibrium between the SNPs, from 0 (white) to 1.0 (bright red), as measured by the disequilibrium coefficient  $r^2$ .

Sup Table 1: Genotype Count and HWE for (A) 34 SNPs in European-American, Hispanic-American, Korean, and Japanese Population, and (B) rs 1143679 in UK, Mexican, and Colombian populations

A.

| GENE         | SNP              | Position        | Alleles    | Function             | European-American (742/1054) |                  |                |              | Hispanic-American (731/229) |                 |               |              | Korean (661/781) |              |              |          | Japanese (176/361) |              |              |          |
|--------------|------------------|-----------------|------------|----------------------|------------------------------|------------------|----------------|--------------|-----------------------------|-----------------|---------------|--------------|------------------|--------------|--------------|----------|--------------------|--------------|--------------|----------|
|              |                  |                 |            |                      | (1,1)                        | (1,2)            | (2,2)          | HWE*         | (1,1)                       | (1,2)           | (2,2)         | HWE*         | (1,1)            | (1,2)        | (2,2)        | HWE*     | (1,1)              | (1,2)        | (2,2)        | HWE*     |
| TRIM72       | rs8056505        | 31122399        | A/G        | intron_5             | (354/477)                    | (314/462)        | (68/113)       | 0.944        | (239/80)                    | (369/117)       | (123/32)      | 0.490        | (447/507)        | (194/244)    | (19/30)      | 0.909    | (124/254)          | (48/97)      | (5/13)       | 0.620    |
| TRIM72       | rs13339393       | 31123484        | A/C        | intron_1             | (734/1050)                   | (1/2)            | (2/1)          | 0.003        | (720/226)                   | (8/3)           | (1/0)         | 1            | (659/780)        | (0/0)        | (0/0)        | 1        | .                  | .            | .            | .        |
| ITGAM        | rs8057320        | 31177052        | A/G        | 5'promoter           | (368/495)                    | (306/452)        | (61/104)       | 0.943        | (265/84)                    | (352/116)       | (110/29)      | 0.403        | (435/487)        | (201/257)    | (25/37)      | 0.668    | (117/224)          | (54/105)     | (4/16)       | 0.560    |
| ITGAM        | rs7193943        | 31178564        | A/G        | 5'promoter           | (369/504)                    | (303/447)        | (59/101)       | 0.885        | (291/96)                    | (342/108)       | (98/25)       | 0.661        | (435/487)        | (201/257)    | (25/37)      | 0.668    | (0/0)              | (0/0)        | (0/0)        | 1        |
| ITGAM        | rs11865830       | 31179046        | A/G        | intron_1             | (369/500)                    | (307/449)        | (60/102)       | 1            | (284/86)                    | (347/118)       | (100/25)      | 0.201        | (443/496)        | (193/248)    | (25/37)      | 0.382    | (122/246)          | (51/103)     | (4/16)       | 0.470    |
| ITGAM        | rs8063978        | 31179201        | A/G        | intron_1             | (729/1044)                   | (7/8)            | (0/1)          | 0.021        | (700/213)                   | (31/16)         | (0/0)         | 1            | (661/778)        | (0/0)        | (0/0)        | 1        | .                  | .            | .            | .        |
| ITGAM        | rs1549298        | 31179492        | G/A        | intron_1             | (734/1044)                   | (4/8)            | (0/1)          | 0.021        | (706/214)                   | (25/15)         | (0/0)         | 1            | (661/781)        | (0/0)        | (0/0)        | 1        | .                  | .            | .            | .        |
| <b>ITGAM</b> | <b>rs1143679</b> | <b>31184312</b> | <b>G/A</b> | <b>exon_3/nonsyn</b> | <b>(494/829)</b>             | <b>(220/211)</b> | <b>(22/11)</b> | <b>0.752</b> | <b>(502/189)</b>            | <b>(210/40)</b> | <b>(15/0)</b> | <b>0.229</b> | <b>(661/779)</b> | <b>(0/0)</b> | <b>(0/0)</b> | <b>1</b> | <b>(0/0)</b>       | <b>(0/0)</b> | <b>(0/0)</b> | <b>1</b> |
| ITGAM        | rs8048583        | 31187037        | G/A        | intron_5             | (355/481)                    | (311/450)        | (71/121)       | 0.361        | (244/74)                    | (361/120)       | (126/35)      | 0.345        | (429/468)        | (202/273)    | (30/40)      | 1        | (119/242)          | (52/106)     | (5/17)       | 0.480    |
| ITGAM        | rs9929801        | 31190973        | A/G        | intron_7             | (705/1037)                   | (13/12)          | (0/2)          | 0.001        | (676/207)                   | (49/22)         | (4/0)         | 1            | (661/781)        | (0/0)        | (0/0)        | 1        | .                  | .            | .            | .        |
| ITGAM        | rs9936831        | 31194649        | A/T        | intron_9             | (483/809)                    | (230/222)        | (23/19)        | 0.390        | (477/177)                   | (223/50)        | (30/2)        | 0.751        | (661/781)        | (0/0)        | (0/0)        | 1        | .                  | .            | .            | .        |
| ITGAM        | rs3087444        | 31195512        | C          | exon_10              | (738/1052)                   | (0/0)            | (0/0)          | 1            | (731/229)                   | (0/0)           | (0/0)         | 1            | (661/781)        | (0/0)        | (0/0)        | 1        | .                  | .            | .            | .        |
| ITGAM        | rs11861251       | 31196897        | A/G        | exon_12/nonsyn       | (544/771)                    | (174/254)        | (16/28)        | 0.270        | (629/196)                   | (100/32)        | (2/1)         | 1            | (661/780)        | (0/1)        | (0/0)        | 1        | .                  | .            | .            | .        |
| ITGAM        | rs9888879        | 31217873        | A/G        | intron_14            | (474/804)                    | (238/227)        | (25/21)        | 0.267        | (451/164)                   | (241/61)        | (39/4)        | 0.615        | (661/780)        | (0/0)        | (0/0)        | 1        | .                  | .            | .            | .        |
| ITGAM        | rs12928810       | 31219216        | G/A        | intron_14            | (532/828)                    | (136/190)        | (24/20)        | 0.055        | (538/180)                   | (107/46)        | (31/2)        | 0.747        | (659/776)        | (0/0)        | (0/0)        | 1        | .                  | .            | .            | .        |
| ITGAM        | rs9888739        | 31220754        | G/A        | intron_14            | (464/802)                    | (240/227)        | (25/21)        | 0.267        | (451/164)                   | (240/61)        | (39/4)        | 0.615        | (661/781)        | (0/0)        | (0/0)        | 1        | .                  | .            | .            | .        |
| ITGAM        | rs7499077        | 31225006        | G/A        | intron_14            | (331/567)                    | (318/393)        | (89/92)        | 0.052        | (374/137)                   | (289/80)        | (66/12)       | 1            | (661/780)        | (0/1)        | (0/0)        | 1        | .                  | .            | .            | .        |
| ITGAM        | rs11860650       | 31234207        | G/A        | intron_14            | (488/814)                    | (221/219)        | (24/17)        | 0.561        | (498/183)                   | (206/46)        | (24/0)        | 0.142        | (653/767)        | (1/4)        | (0/0)        | 1        | .                  | .            | .            | .        |
| ITGAM        | rs6565227        | 31236492        | A/T        | intron_14            | (475/803)                    | (238/226)        | (25/22)        | 0.211        | (451/164)                   | (241/61)        | (38/4)        | 0.615        | (661/781)        | (0/0)        | (0/0)        | 1        | .                  | .            | .            | .        |
| ITGAM        | rs8056264        | 31240156        | G/A        | exon_15/syn          | (730/1044)                   | (6/9)            | (0/0)          | 1            | (705/218)                   | (26/11)         | (0/0)         | 1            | (661/781)        | (0/0)        | (0/0)        | 1        | .                  | .            | .            | .        |
| ITGAM        | rs7206295        | 31244020        | G/A        | intron_19            | (360/490)                    | (298/451)        | (61/108)       | 0.830        | (260/80)                    | (357/119)       | (114/30)      | 0.213        | (430/471)        | (205/268)    | (26/42)      | 0.609    | (119/246)          | (53/103)     | (3/16)       | 0.470    |
| ITGAM        | rs1143683        | 31244389        | G/A        | exon_21/nonsyn       | (439/749)                    | (265/273)        | (33/30)        | 0.352        | (474/174)                   | (222/54)        | (34/1)        | 0.217        | (659/781)        | (0/0)        | (0/0)        | 1        | .                  | .            | .            | .        |
| ITGAM        | rs9930690        | 31249753        | -          | intron_28            | (0/0)                        | (0/0)            | (0/0)          | NA           | (0/0)                       | (0/0)           | (0/0)         | NA           | (0/0)            | (0/0)        | (0/0)        | NA       | .                  | .            | .            | .        |
| ITGAM        | rs1143678        | 31250506        | G/A        | exon30/nonsyn        | (439/747)                    | (265/270)        | (32/33)        | 0.203        | (472/169)                   | (223/57)        | (35/1)        | 0.141        | (659/781)        | (0/0)        | (0/0)        | 1        | .                  | .            | .            | .        |
| ITGAM        | rs9933520        | 31250887        | A/G        | 3'utr                | (412/738)                    | (159/234)        | (45/36)        | 0.003        | (463/170)                   | (114/55)        | (50/1)        | 0.140        | (659/781)        | (0/0)        | (0/0)        | 1        | .                  | .            | .            | .        |
| ITGAM        | rs3087796        | 31251154        | G/A        | 3'utr                | (421/532)                    | (203/351)        | (65/110)       | 3.6E-05      | (373/87)                    | (168/93)        | (113/30)      | 0.551        | (399/451)        | (201/264)    | (28/43)      | 0.608    | (120/245)          | (53/103)     | (4/17)       | 0.363    |
| ITGAM        | rs4597342        | 31251270        | G/A        | 3'utr                | (366/493)                    | (307/448)        | (64/110)       | 0.568        | (260/78)                    | (357/121)       | (114/30)      | 0.166        | (425/464)        | (208/274)    | (28/43)      | 0.762    | (117/245)          | (53/102)     | (4/17)       | 0.330    |
| .            | rs4506917        | 31254851        | C/A        | .                    | (154/285)                    | (384/513)        | (189/252)      | 0.536        | (300/80)                    | (335/103)       | (95/46)       | 0.224        | (411/454)        | (221/283)    | (29/44)      | 1        | .                  | .            | .            | .        |
| .            | rs4075052        | 31255734        | C/A        | .                    | (361/493)                    | (305/445)        | (63/111)       | 0.432        | (255/76)                    | (359/122)       | (116/31)      | 0.132        | (413/454)        | (219/283)    | (29/44)      | 1        | .                  | .            | .            | .        |
| .            | rs4261553        | 31256665        | G/A        | .                    | (362/493)                    | (280/428)        | (65/111)       | 0.247        | (257/76)                    | (310/118)       | (113/31)      | 0.212        | (413/454)        | (219/283)    | (29/44)      | 1        | (118/243)          | (53/104)     | (6/18)       | 0.300    |
| .            | rs11150613       | 31265311        | A/G        | .                    | (359/489)                    | (309/445)        | (68/115)       | 0.394        | (255/75)                    | (359/123)       | (116/31)      | 0.130        | (413/454)        | (218/283)    | (30/43)      | 1        | .                  | .            | .            | .        |
| ITGAX        | rs2230429        | 31282036        | G/C        | missense             | (342/458)                    | (320/459)        | (73/136)       | 0.246        | (381/103)                   | (288/91)        | (62/35)       | 0.059        | (412/463)*       | (210/274)    | (29/36)      | 0.678    | (122/2247)         | (52/101)     | (3/17)       | 0.290    |
| ITGAX        | rs2230427        | 31298621        | A/G        | exon_25              | (735/1042)                   | (3/11)           | (0/0)          | 1            | (702/217)                   | (28/12)         | (1/0)         | 1            | (661/781)        | (0/0)        | (0/0)        | 1        | .                  | .            | .            | .        |
| ITGAX        | rs9929832        | 31301045        | A/G        | 3'utr                | (194/310)                    | (345/491)        | (195/251)      | 0.047        | (209/57)                    | (340/118)       | (180/54)      | 0.599        | (388/491)        | (242/244)    | (31/46)      | 0.044    | (123/249)          | (50/106)     | (4/9)        | 0.850    |

\*minor allele flipped

B.

| GENE  | SNP       | Position | Alleles | Function      | UK (445/528) |          |        |       | Mexican (389/284) |          |        |       | Colombian (205/381) |         |       |       |  |  |  |  |
|-------|-----------|----------|---------|---------------|--------------|----------|--------|-------|-------------------|----------|--------|-------|---------------------|---------|-------|-------|--|--|--|--|
|       |           |          |         |               | (1,1)        | (1,2)    | (2,2)  | HWE*  | (1,1)             | (1,2)    | (2,2)  | HWE*  | (1,1)               | (1,2)   | (2,2) | HWE*  |  |  |  |  |
| ITGAM | rs1143679 | 31184312 | G/A     | exon_3/nonsyn | (294/431)    | (109/84) | (19/5) | 0.040 | (280/277)         | (101/52) | (11/2) | 0.737 | (122/122)           | (74/33) | (9/9) | 0.596 |  |  |  |  |

\* HWE=HWE based on controls

**Sup Table 2: Information on 76 AIMS used to estimate Hispanic population structure and structured association analysis**

| chrom. | SNP        | position  | A1 | A2 | African (Hapmap)* | Seldin EUR* | Seldin AMI* | $\sigma$ (AF-EUR) | $\sigma$ (AF-AMI) | $\sigma$ (EUR-AMI) |
|--------|------------|-----------|----|----|-------------------|-------------|-------------|-------------------|-------------------|--------------------|
| chr1   | rs3013047  | 13703164  | A  | G  | 0.467             | 0.19        | 0.85        | 0.343             | 0.317             | 0.66               |
| chr1   | rs7417447  | 30510596  | A  | G  | 0.418             | 0.89        | 0.25        | 0.308             | 0.332             | 0.64               |
| chr1   | rs10754436 | 116570421 | A  | G  | 0.89              | 0.86        | 0.45        | 0.75              | 0.34              | 0.41               |
| chr1   | rs6695103  | 231699287 | A  | G  | 0.534             | 0.14        | 0.76        | 0.326             | 0.294             | 0.62               |
| chr1   | rs6672147  | 243355116 | A  | G  | 0.559             | 0.79        | 0.12        | 0.349             | 0.321             | 0.67               |
| chr1   | rs10802514 | 245704372 | T  | G  | 0.558             | 0.82        | 0.11        | 0.378             | 0.332             | 0.71               |
| chr1   | rs9439458  | 1441243   | C  | T  | 0.127             | 0.14        | 0.55        | 0.733             | 0.323             | 0.41               |
| chr1   | rs1341249  | 204026499 | C  | T  | 0.552             | 0.82        | 0.14        | 0.372             | 0.308             | 0.68               |
| chr2   | rs6432531  | 159973766 | A  | G  | 0.5               | 0.86        | 0.2         | 0.36              | 0.3               | 0.66               |
| chr2   | rs6758494  | 172488332 | C  | T  | 0.55              | 0.12        | 0.75        | 0.33              | 0.3               | 0.63               |
| chr2   | rs4538161  | 181437273 | C  | T  | 0.567             | 0.11        | 0.78        | 0.323             | 0.347             | 0.67               |
| chr3   | rs709641   | 10357638  | A  | G  | 0.108             | 0.6         | 0.13        | 0.292             | 0.762             | 0.47               |
| chr3   | rs2033704  | 41599118  | A  | G  | 0.217             | 0.14        | 0.47        | 0.643             | 0.313             | 0.33               |
| chr3   | rs4687805  | 52098353  | A  | G  | 0.441             | 0.85        | 0.24        | 0.291             | 0.319             | 0.61               |
| chr3   | rs9830096  | 124013259 | A  | G  | 0.475             | 0.21        | 0.82        | 0.315             | 0.295             | 0.61               |
| chr3   | rs6441308  | 101725048 | T  | C  | 0.567             | 0.8         | 0.11        | 0.367             | 0.323             | 0.69               |
| chr3   | rs6810132  | 13389864  | A  | G  | 0.144             | 0.56        | 0.11        | 0.296             | 0.746             | 0.45               |
| chr3   | rs10433406 | 125675364 | A  | C  | 0.568             | 0.11        | 0.73        | 0.322             | 0.298             | 0.62               |
| chr4   | rs4272045  | 61346511  | A  | G  | 0.567             | 0.14        | 0.84        | 0.293             | 0.407             | 0.7                |
| chr4   | rs2288961  | 101541124 | A  | G  | 0.433             | 0.87        | 0.2         | 0.303             | 0.367             | 0.67               |
| chr4   | rs6824854  | 182302276 | C  | T  | 0.467             | 0.24        | 0.85        | 0.293             | 0.317             | 0.61               |
| chr4   | rs1377859  | 178986081 | A  | G  | 0.892             | 0.87        | 0.51        | 0.762             | 0.402             | 0.36               |
| chr4   | rs13113121 | 22571570  | C  | T  | 0.475             | 0.18        | 0.83        | 0.345             | 0.305             | 0.65               |
| chr5   | rs1816235  | 5200032   | A  | G  | 0.558             | 0.76        | 0.13        | 0.318             | 0.312             | 0.63               |
| chr5   | rs2289854  | 53580894  | T  | G  | 0.45              | 0.24        | 0.88        | 0.31              | 0.33              | 0.64               |
| chr5   | rs7734243  | 109700718 | T  | C  | 0.825             | 0.89        | 0.57        | 0.715             | 0.395             | 0.32               |
| chr5   | rs703727   | 173134334 | T  | C  | 0.483             | 0.87        | 0.18        | 0.353             | 0.337             | 0.69               |
| chr6   | rs1119220  | 97558632  | A  | G  | 0.417             | 0.88        | 0.25        | 0.297             | 0.333             | 0.63               |
| chr6   | rs1737324  | 163718256 | A  | G  | 0.442             | 0.86        | 0.24        | 0.302             | 0.318             | 0.62               |
| chr6   | rs1076929  | 36456778  | A  | G  | 0.417             | 0.29        | 0.89        | 0.293             | 0.307             | 0.6                |
| chr6   | rs9442831  | 73417354  | A  | G  | 0.525             | 0.14        | 0.82        | 0.335             | 0.345             | 0.68               |
| chr6   | rs626755   | 149812757 | C  | T  | 0.551             | 0.14        | 0.74        | 0.309             | 0.291             | 0.6                |
| chr7   | rs1263542  | 157113869 | A  | G  | 0.527             | 0.79        | 0.13        | 0.317             | 0.343             | 0.66               |
| chr7   | rs2242480  | 99199402  | C  | T  | 0.892             | 0.89        | 0.43        | 0.782             | 0.322             | 0.46               |
| chr7   | rs4723034  | 30961436  | T  | G  | 0.792             | 0.87        | 0.5         | 0.662             | 0.292             | 0.37               |
| chr7   | rs801524   | 18673443  | A  | G  | 0.102             | 0.17        | 0.54        | 0.728             | 0.358             | 0.37               |
| chr7   | rs1859569  | 139195073 | A  | G  | 0.517             | 0.16        | 0.84        | 0.323             | 0.357             | 0.68               |
| chr8   | rs4237080  | 34900051  | A  | G  | 0.836             | 0.86        | 0.46        | 0.696             | 0.296             | 0.4                |
| chr8   | rs7006402  | 10220757  | T  | C  | 0.425             | 0.87        | 0.21        | 0.295             | 0.365             | 0.66               |
| chr8   | rs10106280 | 13396485  | T  | A  | 0.414             | 0.88        | 0.17        | 0.294             | 0.416             | 0.71               |
| chr8   | rs16895886 | 122785230 | A  | G  | 0.461             | 0.22        | 0.83        | 0.319             | 0.291             | 0.61               |
| chr9   | rs791656   | 12481250  | A  | G  | 0.567             | 0.13        | 0.87        | 0.303             | 0.437             | 0.74               |
| chr10  | rs1769236  | 724229    | A  | C  | 0.875             | 0.89        | 0.51        | 0.765             | 0.385             | 0.38               |
| chr10  | rs7906881  | 76271373  | A  | T  | 0.11              | 0.11        | 0.53        | 0.78              | 0.36              | 0.42               |
| chr10  | rs2242258  | 75277174  | C  | T  | 0.417             | 0.21        | 0.88        | 0.373             | 0.297             | 0.67               |
| chr11  | rs7118743  | 99123810  | C  | T  | 0.482             | 0.22        | 0.83        | 0.298             | 0.312             | 0.61               |
| chr11  | rs11605105 | 44670504  | G  | T  | 0.455             | 0.87        | 0.15        | 0.325             | 0.395             | 0.72               |
| chr12  | rs584878   | 48610834  | A  | C  | 0.55              | 0.15        | 0.75        | 0.3               | 0.3               | 0.6                |
| chr12  | rs1486405  | 114535056 | A  | G  | 0.517             | 0.82        | 0.12        | 0.337             | 0.363             | 0.7                |
| chr12  | rs7961135  | 7697306   | C  | T  | 0.509             | 0.18        | 0.8         | 0.311             | 0.309             | 0.62               |
| chr12  | rs3809254  | 3811527   | T  | C  | 0.442             | 0.86        | 0.26        | 0.302             | 0.298             | 0.6                |
| chr12  | rs3111342  | 17320410  | T  | G  | 0.517             | 0.78        | 0.12        | 0.297             | 0.363             | 0.66               |
| chr13  | rs11164137 | 113223874 | A  | G  | 0.433             | 0.87        | 0.21        | 0.303             | 0.357             | 0.66               |
| chr13  | rs4769414  | 24686586  | T  | C  | 0.458             | 0.24        | 0.85        | 0.302             | 0.308             | 0.61               |
| chr13  | rs1158807  | 33292716  | A  | G  | 0.558             | 0.13        | 0.74        | 0.312             | 0.298             | 0.61               |
| chr14  | rs17116374 | 81668270  | T  | A  | 0.108             | 0.15        | 0.58        | 0.742             | 0.312             | 0.43               |
| chr14  | rs1191554  | 29068585  | A  | C  | 0.867             | 0.43        | 0.87        | 0.297             | 0.737             | 0.44               |
| chr14  | rs6575700  | 98419370  | A  | G  | 0.517             | 0.13        | 0.84        | 0.353             | 0.357             | 0.71               |
| chr15  | rs11073161 | 34321848  | A  | C  | 0.475             | 0.22        | 0.88        | 0.305             | 0.355             | 0.66               |
| chr15  | rs11070883 | 50270857  | A  | G  | 0.441             | 0.26        | 0.89        | 0.299             | 0.331             | 0.63               |
| chr15  | rs1077834  | 56510771  | A  | G  | 0.56              | 0.8         | 0.14        | 0.36              | 0.3               | 0.66               |
| chr15  | rs2898685  | 37733172  | G  | A  | 0.542             | 0.12        | 0.83        | 0.338             | 0.372             | 0.71               |
| chr15  | rs2068982  | 72702941  | A  | G  | 0.525             | 0.15        | 0.79        | 0.325             | 0.315             | 0.64               |
| chr15  | rs8036731  | 91827831  | A  | G  | 0.457             | 0.2         | 0.85        | 0.343             | 0.307             | 0.65               |
| chr15  | rs1532750  | 80174831  | C  | T  | 0.483             | 0.19        | 0.81        | 0.327             | 0.293             | 0.62               |
| chr16  | rs6564869  | 79930226  | A  | C  | 0.508             | 0.85        | 0.19        | 0.358             | 0.302             | 0.66               |
| chr16  | rs12596707 | 8182147   | A  | G  | 0.175             | 0.14        | 0.49        | 0.685             | 0.335             | 0.35               |
| chr18  | rs939233   | 75962647  | A  | G  | 0.5               | 0.88        | 0.19        | 0.38              | 0.31              | 0.69               |
| chr18  | rs12957402 | 17885012  | T  | C  | 0.417             | 0.89        | 0.29        | 0.307             | 0.293             | 0.6                |
| chr18  | rs4891724  | 64961189  | A  | G  | 0.867             | 0.87        | 0.46        | 0.737             | 0.327             | 0.41               |
| chr18  | rs500899   | 41676278  | C  | T  | 0.492             | 0.14        | 0.85        | 0.368             | 0.342             | 0.71               |
| chr19  | rs3746319  | 49304071  | T  | C  | 0.508             | 0.18        | 0.81        | 0.312             | 0.318             | 0.63               |
| chr20  | rs4812817  | 42367435  | A  | G  | 0.517             | 0.78        | 0.18        | 0.297             | 0.303             | 0.6                |
| chr20  | rs6133125  | 4407954   | A  | G  | 0.883             | 0.41        | 0.87        | 0.293             | 0.753             | 0.46               |
| chr21  | rs12386284 | 25811939  | G  | T  | 0.575             | 0.79        | 0.11        | 0.365             | 0.315             | 0.68               |
| chr22  | rs2540620  | 16994874  | A  | C  | 0.542             | 0.86        | 0.13        | 0.402             | 0.328             | 0.73               |

$\sigma$ : the allele frequency difference between 2 populations

AMI: American-Indian

EUR: European

\*:the allele2 frequency

Sup Table 3: Genetic Model for rs1143679

| European Americans |          |              |             |                  |         |        |
|--------------------|----------|--------------|-------------|------------------|---------|--------|
| Model              | Genotype | Control      | Case        | OR (95% CI)      | P-value | AIC    |
| Codominant         | G/G      | 830 (78.8%)  | 496 (67.2%) | 1                | <0.0001 | 2400.6 |
|                    | A/G      | 211 (20%)    | 220 (29.8%) | 1.74 (1.40-2.17) |         |        |
|                    | A/A      | 12 (1.1%)    | 22 (3%)     | 3.07 (1.51-6.25) |         |        |
| Dominant           | G/G      | 830 (78.8%)  | 496 (67.2%) | 1                | <0.0001 | 2401   |
|                    | A/G-A/A  | 223 (21.2%)  | 242 (32.8%) | 1.82 (1.47-2.25) |         |        |
| Recessive          | G/G-A/G  | 1041 (98.9%) | 716 (97%)   | 1                | 0.0053  | 2423.4 |
|                    | A/A      | 12 (1.1%)    | 22 (3%)     | 2.67 (1.31-5.42) |         |        |
| Multiplicative     | ---      | ---          | ---         | 1.75 (1.44-2.12) | <0.0001 | 2398.6 |

| Hispanics Americans |          |             |             |                  |         |        |
|---------------------|----------|-------------|-------------|------------------|---------|--------|
| Model               | Genotype | Control     | Case        | OR (95% CI)      | P-value | AIC    |
| Codominant          | G/G      | 189 (82.5%) | 503 (68.8%) | 1                | <0.0001 | 1038   |
|                     | A/G      | 40 (17.5%)  | 212 (29%)   | 1.99 (1.37-2.90) |         |        |
|                     | A/A      | 0 (0%)      | 16 (2.2%)   | NA (0.00-NA)     |         |        |
| Dominant            | G/G      | 189 (82.5%) | 503 (68.8%) | 1                | <0.0001 | 1041.4 |
|                     | A/G-A/A  | 40 (17.5%)  | 228 (31.2%) | 2.14 (1.47-3.12) |         |        |
| Recessive           | G/G-A/G  | 229 (100%)  | 715 (97.8%) | 1                | 0.003   | 1050   |
|                     | A/A      | 0 (0%)      | 16 (2.2%)   | NA (0.00-NA)     |         |        |
| Multiplicative      | ---      | ---         | ---         | 2.16 (1.51-3.10) | <0.0001 | 1038.7 |

| UK             |          |             |             |                   |          |        |
|----------------|----------|-------------|-------------|-------------------|----------|--------|
| Model          | Genotype | Control     | Case        | OR (95% CI)       | P-value  | AIC    |
| Codominant     | G/G      | 436 (82.7%) | 306 (69.5%) | 1                 | <0.0001  | 1310.7 |
|                | A/G      | 86 (16.3%)  | 115 (26.1%) | 1.91 (1.39-2.61)  |          |        |
|                | A/A      | 5 (1%)      | 19 (4.3%)   | 5.41 (2.00-14.66) |          |        |
| Dominant       | G/G      | 436 (82.7%) | 306 (69.5%) | 1                 | <0.0001  | 1313.4 |
|                | A/G-A/A  | 91 (17.3%)  | 134 (30.4%) | 2.10 (1.55-2.84)  |          |        |
| Recessive      | G/G-A/G  | 522 (99%)   | 421 (95.7%) | 1                 | 6.00E-04 | 1325   |
|                | A/A      | 5 (1%)      | 19 (4.3%)   | 4.71 (1.74-12.72) |          |        |
| Multiplicative | ---      | ---         | ---         | 2.02 (1.54-2.64)  | <0.0001  | 1309.2 |

| Mexican        |          |             |             |                   |         |       |
|----------------|----------|-------------|-------------|-------------------|---------|-------|
| Model          | Genotype | Control     | Case        | OR (95% CI)       | P-value | AIC   |
| Codominant     | G/G      | 227 (80.8%) | 280 (71.4%) | 1                 | 0.0068  | 910.6 |
|                | A/G      | 52 (18.5%)  | 101 (25.8%) | 1.57 (1.08-2.30)  |         |       |
|                | A/A      | 2 (0.7%)    | 11 (2.8%)   | 4.46 (0.98-20.32) |         |       |
| Dominant       | G/G      | 227 (80.8%) | 280 (71.4%) | 1                 | 0.0051  | 910.7 |
|                | A/G-A/A  | 54 (19.2%)  | 112 (28.6%) | 1.68 (1.16-2.43)  |         |       |
| Recessive      | G/G-A/G  | 279 (99.3%) | 381 (97.2%) | 1                 | 0.038   | 914.3 |
|                | A/A      | 2 (0.7%)    | 11 (2.8%)   | 4.03 (0.89-18.31) |         |       |
| Multiplicative | ---      | ---         | ---         | 1.68 (1.20-2.35)  | 0.0021  | 909.1 |

| Colombian      |          |             |             |                   |         |       |
|----------------|----------|-------------|-------------|-------------------|---------|-------|
| Model          | Genotype | Control     | Case        | OR (95% CI)       | P-value | AIC   |
| Codominant     | G/G      | 298 (78.8%) | 122 (59.5%) | 1                 | <0.0001 | 737   |
|                | A/G      | 75 (19.8%)  | 74 (36.1%)  | 2.41 (1.64-3.54)  |         |       |
|                | A/A      | 5 (1.3%)    | 9 (4.4%)    | 4.40 (1.44-13.39) |         |       |
| Dominant       | G/G      | 298 (78.8%) | 122 (59.5%) | 1                 | <0.0001 | 736.1 |
|                | A/G-A/A  | 80 (21.2%)  | 83 (40.5%)  | 2.53 (1.75-3.68)  |         |       |
| Recessive      | G/G-A/G  | 373 (98.7%) | 196 (95.6%) | 1                 | 0.025   | 755.1 |
|                | A/A      | 5 (1.3%)    | 9 (4.4%)    | 3.43 (1.13-10.36) |         |       |
| Multiplicative | ---      | ---         | ---         | 2.31 (1.66-3.23)  | <0.0001 | 735.1 |

**Sup Table 4:** Comparisons of BIMBAM and IMPUTE/SNPTEST programs for imputation-based association test results.

| SNP              | POS             | TYPE         | RSQR     | BIMBAM_log10(BF) |               | IMPUTE/SNPTEST  |
|------------------|-----------------|--------------|----------|------------------|---------------|-----------------|
|                  |                 |              |          | i=10000          | i=1           | P value         |
| rs8056505        | 31122399        | typed        | 0.007    | -0.434           | -0.434        | 0.448457        |
| rs2288005        | 31135409        | imputed      | 0.091    | 1.47             | 1.704         | 0.00344042      |
| rs7186832        | 31137964        | imputed      | 0.006    | -0.152           | 0.007         | 0.41728         |
| rs12926702       | 31148472        | imputed      | 0.004    | 0.433            | 1.186         | 0.0093972       |
| rs11639689       | 31165419        | imputed      | 0.002    | 0.061            | 0.238         | 0.984864        |
| rs1808430        | 31166494        | imputed      | 0.012    | -0.043           | 0.185         | 0.163985        |
| rs4561481        | 31167054        | imputed      | 0.139    | -0.231           | 0.064         | 0.221376        |
| rs889551         | 31167923        | imputed      | 0.007    | -0.049           | 0.155         | 0.159941        |
| rs4889640        | 31171768        | imputed      | 0.003    | -0.181           | 0.077         | 0.207168        |
| rs11645526       | 31175740        | imputed      | 0.003    | 0.053            | 0.141         | 0.338242        |
| rs8057320        | 31177052        | typed        | 0.004    | -0.053           | -0.052        | 0.103761        |
| rs7193943        | 31178564        | typed        | 0.004    | -0.031           | -0.032        | 0.0943874       |
| rs11865830       | 31179046        | typed        | 0.004    | -0.129           | -0.129        | 0.13464         |
| <b>rs1143679</b> | <b>31184312</b> | <b>typed</b> | <b>1</b> | <b>20.088</b>    | <b>20.208</b> | <b>6.17E-24</b> |
| rs3815801        | 31184438        | imputed      | 0.004    | 0.124            | 0.143         | 0.0454723       |
| rs8048583        | 31187037        | typed        | 0.012    | 0.129            | 0.129         | 0.0491059       |
| rs2359661        | 31188648        | imputed      | 0.148    | 4.485            | 4.655         | 5.02E-07        |
| rs9936831        | 31194649        | typed        | 0.908    | 18.822           | 18.911        | 2.48E-22        |
| rs7184677        | 31196567        | imputed      | 0.831    | 18.671           | 18.55         | 7.67E-22        |
| rs11861251       | 31196897        | typed        | 0.018    | 0.231            | 0.231         | 0.0425852       |
| rs11861258       | 31203045        | imputed      | 0.002    | 0.461            | 1.383         | 0.0373923       |
| rs8060163        | 31204647        | imputed      | 0.017    | 0.214            | 0.217         | 0.0442214       |
| rs9937837        | 31206440        | imputed      | 0.303    | 6.509            | 6.472         | 1.76E-09        |
| rs13338069       | 31206975        | imputed      | 0.831    | 18.53            | 18.537        | 6.40E-22        |
| rs7190807        | 31209411        | imputed      | 0.831    | 18.532           | 18.554        | 6.60E-22        |
| rs9888879        | 31217873        | typed        | 0.831    | 18.418           | 18.502        | 3.09E-22        |
| rs12928810       | 31219216        | typed        | 0.831    | 18.538           | 18.483        | 2.47E-18        |
| rs11645653       | 31220356        | imputed      | 0.042    | 1.666            | 1.526         | 0.00220925      |
| rs9888739        | 31220754        | typed        | 0.831    | 18.635           | 18.719        | 7.97E-23        |
| rs7499077        | 31225006        | typed        | 0.303    | 6.696            | 6.732         | 9.96E-10        |
| rs11860650       | 31234207        | typed        | 0.764    | 18.157           | 18.25         | 9.46E-22        |
| rs6565227        | 31236492        | typed        | 0.764    | 18.066           | 18.15         | 8.95E-22        |
| rs6565228        | 31236781        | imputed      | 0.808    | 18.506           | 18.033        | 7.73E-21        |
| rs11150610       | 31241737        | imputed      | 0.083    | 2.289            | 1.719         | 0.000810029     |
| rs7206295        | 31244020        | typed        | 0.04     | 0.464            | 0.453         | 0.0144024       |
| rs1143682        | 31244220        | imputed      | 0.071    | 2.931            | 1.681         | 0.000392338     |
| rs1143683        | 31244389        | typed        | 0.656    | 15.266           | 15.261        | 5.82E-19        |
| rs4077810        | 31248410        | imputed      | 0.034    | 0.431            | 0.381         | 0.0121463       |
| rs7193268        | 31248498        | imputed      | 0.563    | 15.353           | 15.329        | 7.98E-19        |
| rs1143678        | 31250506        | typed        | 0.656    | 15.019           | 15.02         | 3.38E-18        |
| rs9933520        | 31250887        | typed        | 0.656    | 15.414           | 15.363        | 5.61E-16        |
| rs3087796        | 31251154        | imputed      | 0.04     | 0.419            | 0.397         | 0.020311        |
| rs4597342        | 31251270        | typed        | 0.04     | 0.381            | 0.381         | 0.0195458       |
| rs4506917        | 31254851        | typed        | 0.141    | 3.845            | 3.827         | 3.18E-06        |
| rs9673519        | 31255058        | imputed      | 0.008    | 0.44             | 0.388         | 0.0195657       |
| rs3925075        | 31255249        | imputed      | 0.141    | 3.694            | 1.572         | 1.88E-06        |
| rs4075052        | 31255734        | typed        | 0.04     | 0.396            | 0.396         | 0.0214537       |



|            |          |         |       |        |        |             |
|------------|----------|---------|-------|--------|--------|-------------|
| rs4608351  | 31256349 | imputed | 0.04  | 0.397  | 0.411  | 0.0197694   |
| rs4261553  | 31256665 | typed   | 0.04  | 0.362  | 0.362  | 0.0181169   |
| rs11150611 | 31263158 | imputed | 0.04  | 0.422  | 0.396  | 0.0210941   |
| rs11150612 | 31265261 | imputed | 0.065 | 2.835  | -0.165 | 0.000337938 |
| rs11150613 | 31265311 | typed   | 0.042 | 0.342  | 0.342  | 0.022834    |
| rs11645917 | 31267327 | imputed | 0.134 | 3.572  | 1.311  | 1.85E-06    |
| rs12923297 | 31268445 | imputed | 0.144 | 4.883  | 1.581  | 1.84E-06    |
| rs4459557  | 31269144 | imputed | 0.04  | 0.383  | 0.373  | 0.0222107   |
| rs4522435  | 31269424 | imputed | 0.002 | 0.266  | 1.833  | 0.0537049   |
| rs4889649  | 31269764 | imputed | 0.074 | 4.286  | 2.168  | 0.000302291 |
| rs4632147  | 31270882 | imputed | 0.665 | 14.883 | 11.372 | 1.28E-18    |
| rs10782004 | 31270918 | imputed | 0.059 | 2.888  | 1.964  | 0.000335108 |
| rs11574630 | 31271289 | imputed | 0.062 | 2.828  | 2.109  | 0.000120691 |
| rs11574631 | 31271478 | imputed | 0.038 | 0.325  | 0.354  | 0.022239    |
| rs11574632 | 31271554 | imputed | 0.02  | 1.877  | -0.113 | 0.00744528  |
| rs4548893  | 31271994 | imputed | 0.404 | 14.344 | 11.436 | 1.21E-17    |
| rs11863903 | 31272410 | imputed | 0.021 | 1.896  | -0.149 | 0.00767088  |
| rs11150614 | 31273517 | imputed | 0.038 | -0.346 | 0.313  | 0.0204552   |
| rs9938765  | 31274259 | imputed | 0.002 | 0.277  | 0.275  | 0.056404    |
| rs11574633 | 31274819 | imputed | 0.013 | 1.211  | 1.377  | 0.0311263   |
| rs7190997  | 31275679 | imputed | 0.114 | 1.354  | 1.335  | 4.06E-05    |
| rs11574635 | 31276317 | imputed | 0.022 | 1.948  | -0.2   | 0.0104375   |
| rs11574636 | 31276336 | imputed | 0.395 | 13.019 | 13.674 | 4.94E-13    |
| rs11574637 | 31276375 | imputed | 0.483 | 13.014 | 13.648 | 1.86E-17    |
| rs11150615 | 31277304 | imputed | 0.483 | 13.015 | 13.648 | 2.06E-17    |
| rs11150616 | 31277591 | imputed | 0.04  | -0.235 | 0.863  | 0.0210541   |
| rs1106398  | 31277953 | imputed | 0.085 | 1.915  | 3.253  | 3.73E-05    |
| rs4264407  | 31278694 | imputed | 0.002 | 0.228  | 0.174  | 0.0569965   |
| rs2230429  | 31282036 | typed   | 0.077 | 1.284  | 1.275  | 0.00154901  |
| rs11150619 | 31284350 | imputed | 0.07  | 2.931  | 2.258  | 0.0060768   |
| rs8046381  | 31286856 | imputed | 0.001 | 0.278  | 0.108  | 0.0525204   |
| rs8052139  | 31294363 | imputed | 0.037 | 0.274  | 0.697  | 0.783686    |
| rs11150620 | 31299690 | imputed | 0.034 | 0.381  | 0.41   | 0.400606    |
| rs2929     | 31300809 | imputed | 0.06  | 0.066  | 0.152  | 0.0151748   |
| rs9929832  | 31301045 | typed   | 0.115 | 0.131  | 0.133  | 0.106695    |
| rs1140195  | 31301680 | imputed | 0.04  | 0.258  | 0.679  | 0.822937    |
| rs11574647 | 31302223 | imputed | 0.04  | 0.258  | 0.679  | 0.802476    |

RSQR: the r-square between each SNP with rs1143679
